# Supplementary material for: Bromodomain and Extra-Terminal Inhibitor BMS-986158 Reverses Latent HIV-1 Infection In Vitro and Ex Vivo by Increasing CDK9 Phosphorylation and Recruitment
Source: MDPI journal article supplement (doi:10.3390/ph15030338), 2022-03-10
Supplement: s1 [file s1]

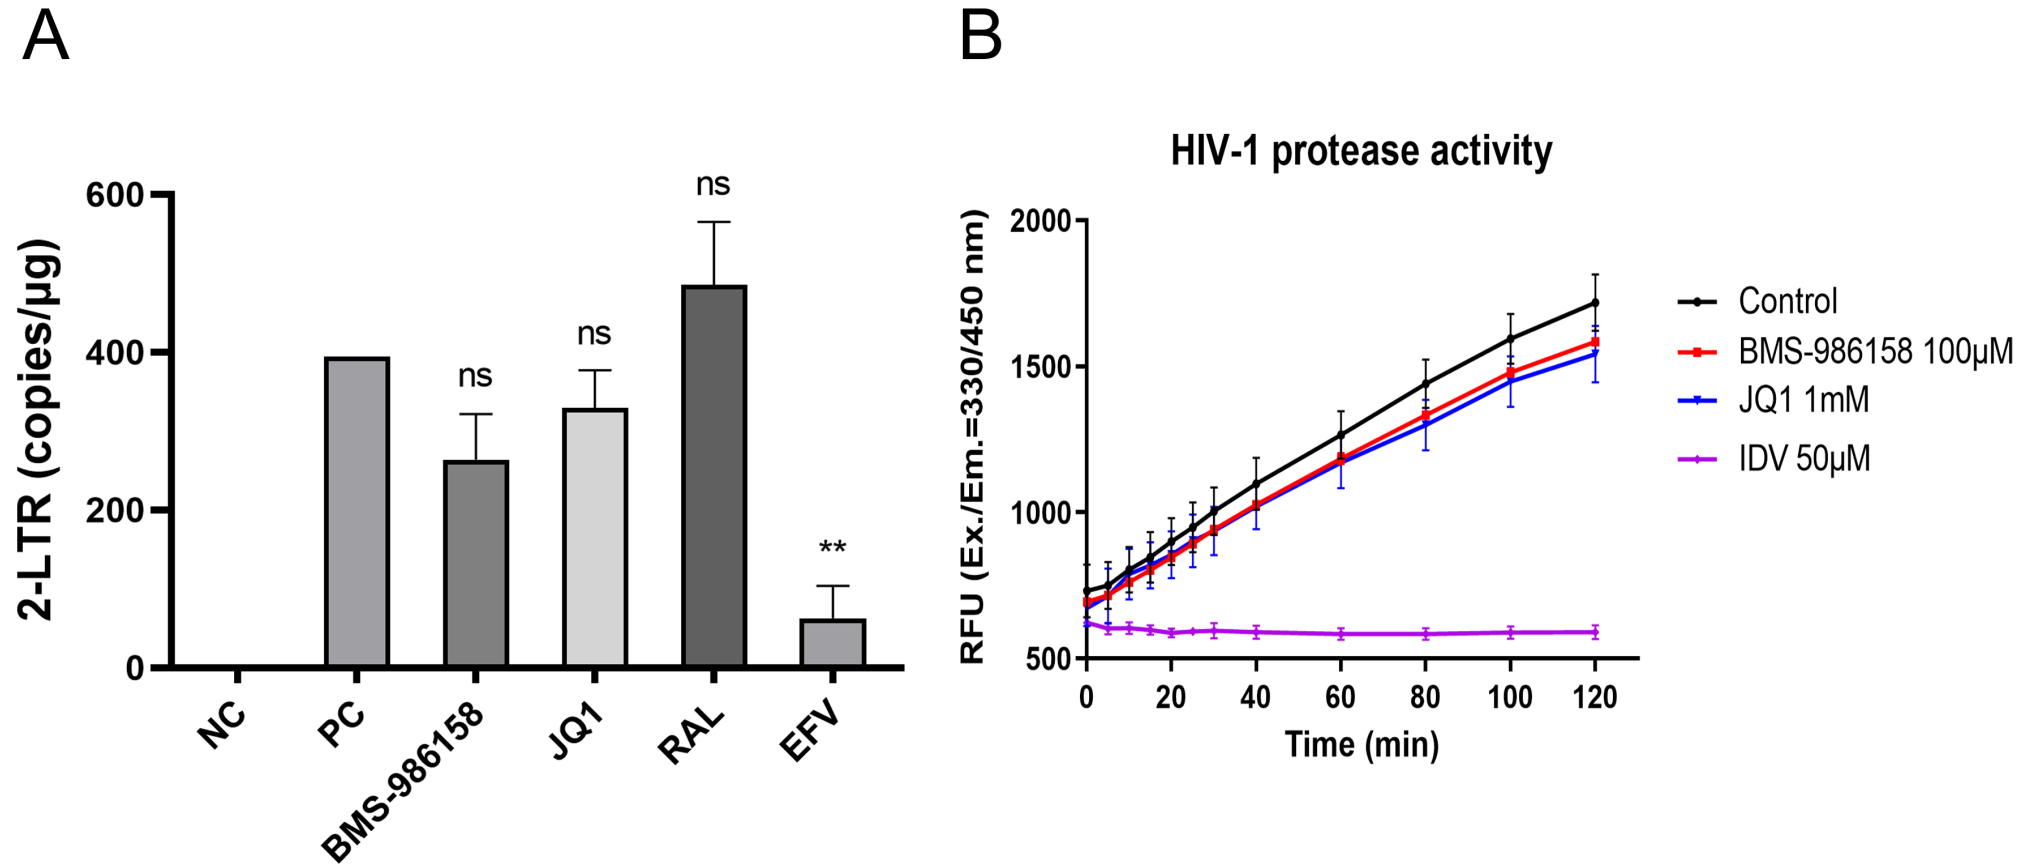

**Figure S1. the effect of BMS-986158 on HIV-1 replication.** (A) BMS-986158 did not inhibit the transcription of HIV-1. HIV-1<sub>IIIB</sub> acute infected C8166 cells were treated with BMS-986158 (100 nM), JQ1(1 μM), raltegravir (RAL) (500 nM) or efavirenz (EFV) (100 nM) for 24 h and cell were harvested for total DNA extraction. The expression of transcription production was determined by qPCR. (B) BMS-986158 did not inhibit the HIV-1 protease activity. Different concentration of compounds were added into 96-well plate containing protease and substrate and the fluorescence value was monitored with a microplate reader.
